# Supplementary material
Source: PubMed Central journal article supplement (PMC3302593)
Supplement: supp_78.7.2249_AEM-AEM06766-11-s01.pdf [file supp_78.7.2249_AEM-AEM06766-11-s01.pdf]

1 **Supplemental Material**  
2 **for**

3  
4 **Roles of *fkbN* in Positive Regulation and *tcs7* in Negative Regulation of FK506**  
5 **Biosynthesis in *Streptomyces* sp. KCTC 11604BP**

6 **Running Title: REGULATION OF FK506 BIOSYNTHESIS**

7  
8 SangJoon Mo<sup>1‡</sup>, Young Ji Yoo<sup>2‡</sup>, Yeon Hee Ban<sup>2</sup>, Sung-kwon Lee<sup>1</sup>, Eunji Kim<sup>2</sup>, Joo-Won  
9 Suh<sup>1\*</sup> and Yeo Joon Yoon<sup>2\*</sup>

10  
11 <sup>1</sup>Division of Bioscience and Bioinformatics, Myongji University, Youngin, 449-7282, Korea

12 <sup>2</sup>Department of Chemistry and Nano Science, Ewha Womans University, Seoul 120-750,  
13 Korea<sup>1</sup>

14  
15 ‡ These authors contributed equally to this work.

16 \*Corresponding authors. Yeo Joon Yoon: Department of Chemistry and Nano Science, Ewha  
17 Womans University, Seoul 120-750, Korea. Phone: 82-2-322-4082. Fax: 82-2-3277-3419. E-  
18 mail: joonyoon@ewha.ac.kr. Joo-Won Suh: Division of Bioscience and Bioinformatics,  
19 Myongji University, Youngin, 449-728, Korea. Phone: 82-31-330-6190. Fax: 82-31-336-  
20 0870. E-mail: jwsuh@mju.ac.kr.

21 Table S1. Primers used in this study.

| Primer        | Sequence 5' to 3' (restriction site underline) | Restriction enzymes |
|---------------|------------------------------------------------|---------------------|
| <b>PCR</b>    |                                                |                     |
| Tcs2_OF       | GGACC <u>AGATCT</u> ATCTCGCACTACATTCGG         | BglII               |
| Tcs2_OR       | GAATCT <u>CTAGACT</u> AGCCCGGAGTCAG            | XbaI                |
| Tcs7_OF       | GGACC <u>AGATCT</u> CGTCCGGTGATGGAATTCTG       | BglII               |
| Tcs7_OR       | GAATCT <u>CTAGAGG</u> ATTCTCAGTCCTGTGGGGCG     | XbaI                |
| FkbN_OF       | AAATT <u>AGATCT</u> CATGGAGACGACGGCCGCGA       | BglII               |
| FkbN_OR       | GTTATT <u>CTAGACT</u> ACCCGCACCGGTCG           | XbaI                |
| Tcs7_LF       | GGTCT <u>CTAGA</u> AGTTCGAACGCGAGCGT           | XbaI                |
| Tcs7_LR       | GTTGGATCCGACGAAGTACTCCAGGGT                    | BamHI               |
| Tcs7_RF       | GTT <u>AGATCT</u> GACCCTCAACCCGCCC             | BglII               |
| Tcs7_RR       | GCT <u>GATATC</u> ATCTCTAGAGTCCCGCC            | EcoRV               |
| FkbN_LF       | GTTA <u>AGCTT</u> TGCACAACCCGATCTGAT           | HindIII             |
| FkbN_LR       | ATTATATCTAGACCGCCCCGGCG                        | XbaI                |
| FkbN_RF       | ATTTATTCTAGACTCGCGGCCGTCGTC                    | XbaI                |
| FkbN_RR       | GCCGA <u>ATTC</u> GTGCCGTCATTTGGTCG            | EcoRI               |
| <b>RT-PCR</b> |                                                |                     |
| TcsA_RTF      | GGGAGCGCTTCTTCTACTCC                           |                     |
| TcsA_RTR      | AGGGAGTCGACACCGAGAT                            |                     |
| TcsB_RTF      | GGACTGTTACCCGACGACTG                           |                     |
| TcsB_RTR      | CGATGACCCAGTCGACATC                            |                     |
| TcsC_RTF      | CTACCGTCAGCTGGTGTC                             |                     |
| TcsC_RTR      | CATATGTGACCCGATGATGC                           |                     |
| TcsD_RTF      | AGAGAGTGTGCGGATCGTCT                           |                     |
| TcsD_RTR      | GTCGGAGAACGACACCTGAT                           |                     |
| Tcs1_RTF      | ACACTGACGGAGACCGACAT                           |                     |
| Tcs1_RTR      | GACCTCGAAGGACACGATTG                           |                     |
| Tcs2_RTF      | AAAAGGTTGTCCTGGATTCG                           |                     |
| Tcs2_RTR      | GAATACGAGGTGGGTCTCCA                           |                     |
| Tcs3_RTF      | AACATGTTACCGCCTATGG                            |                     |
| Tcs3_RTR      | AGCAGGGTGTGACGAGTT                             |                     |

---

|          |                       |
|----------|-----------------------|
| Tcs4_RTF | GGTCACCTTCCATCTCTCCA  |
| Tcs4_RTR | GGCCGTATATCTCCTTGCTG  |
| Tcs5_RTF | CTCGGTATGGGACATCGAAC  |
| Tcs5_RTR | GTGACGTATCCGCCCTCTT   |
| FkbG_RTF | TACGTCCGGAAGGTGTCACT  |
| FkbG_RTR | TAGTAGGCCGGATAGCGTTC  |
| FkbH_RTF | CTGGGATCTGGACAACACCT  |
| FkbH_RTR | ATCCGGCCTGGTACATGAG   |
| FkbI_RTF | CGCGAGACCTATCTGAAGGA  |
| FkbI_RTR | GAAGTGTGCGCGCTCTTC    |
| FkbK_RTF | CACTTCATGAACCCGTCGTA  |
| FkbK_RTR | CACCGGAACACCTCTTCGTA  |
| FkbL_RTF | GTCATCGAGTTCATGCCGTA  |
| FkbL_RTR | GATGTGACGGTGCTCAGGA   |
| FkbO_RTF | GGTATCACCTGCGTGTTCTT  |
| FkbO_RTR | ACTCCTTCGATCTCCACGAG  |
| FkbP_RTF | GCCTACGCGATCTACACCTC  |
| FkbP_RTR | GGACCGTAGTGGTTGTGGAC  |
| FkbD_RTF | ACAGCAGATGGTCGGCTACT  |
| FkbD_RTR | GAGACCCTCGTTCATCGGTA  |
| FkbM_RTF | GACGGTCTCGCACATCAAC   |
| FkbM_RTR | GTCTCGATCTCTTCGCTCGT  |
| FkbN_RTF | GAGCAGCCCCTTATGAACTG  |
| FkbN_RTR | GAGGTGCAGCAGACAGAGC   |
| FkbQ_RTF | GCTGTTCCGGACACAGTATGG |
| FkbQ_RTR | ACTTGTTCCCTGGTGCTCGAC |
| FkbR_RTF | TCAAGACCCTTCACCATCCT  |
| FkbR_RTR | GTACCTGCACTCCCGGATAG  |
| FkbA_RTF | GGTGAGAAGGTCCTGATCCA  |
| FkbA_RTR | CTGCTCATCCAGCCGAAC    |

---

---

|          |                     |
|----------|---------------------|
| FkbB_RTf | CATGGGCCTGAAACTGATG |
| FkbB_RTR | AGACGTTGTCGACCTGTGC |

|          |                      |
|----------|----------------------|
| FkbC_RTf | GGAGGGATGGACGTTTCC   |
| FkbC_RTR | AGGAGTCGGGTGATGATCTG |

---

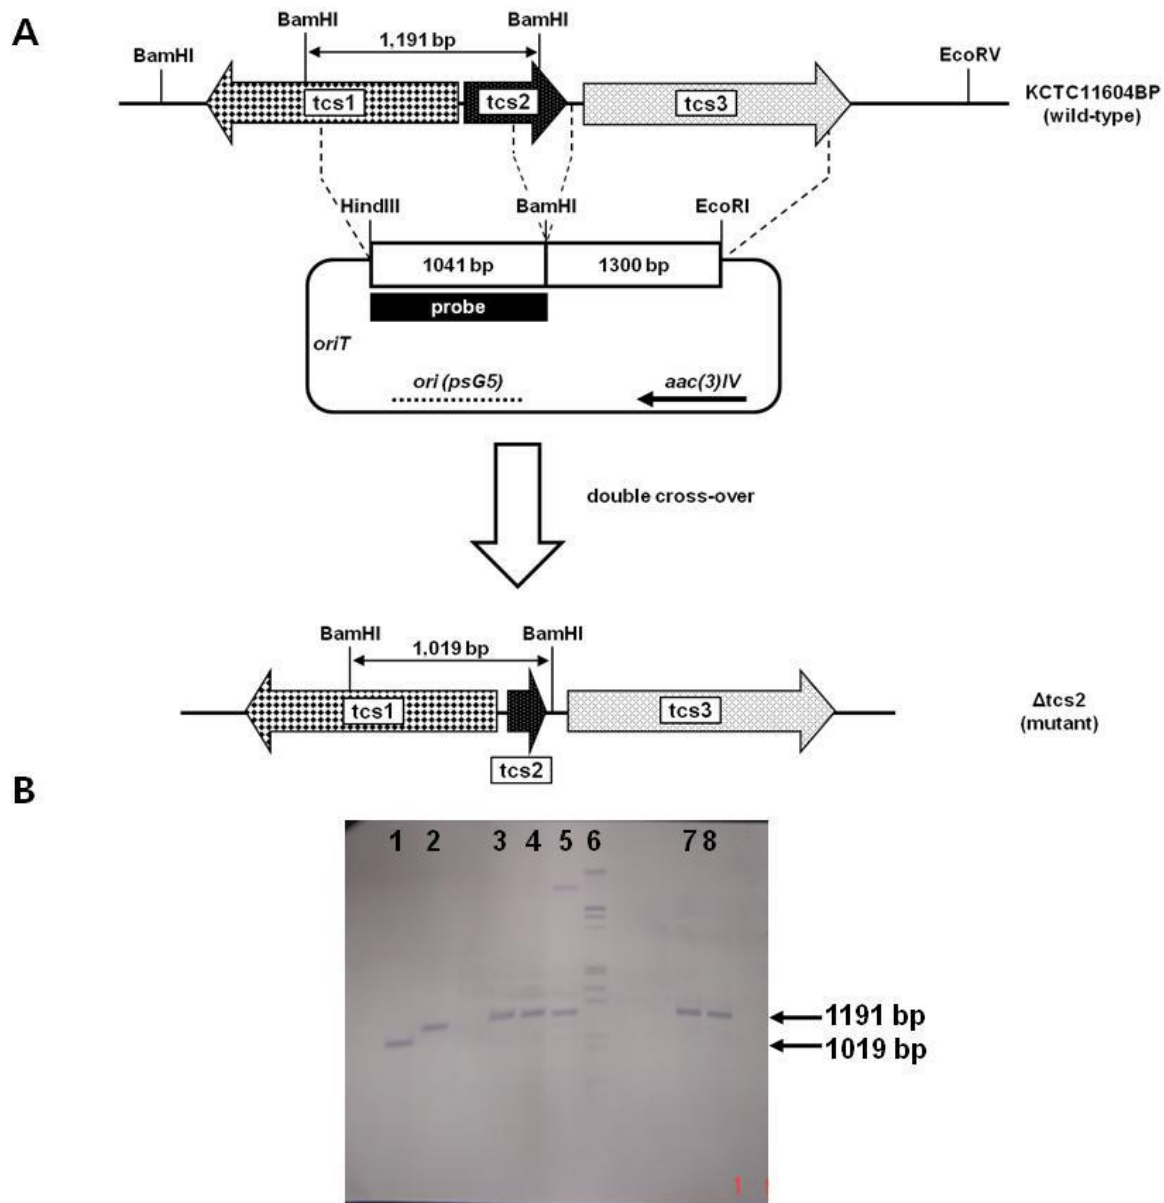

23  
24

25 Fig. S1. Construction and verification of *tcs2* in-frame deletion in *Streptomyces* sp. KCTC  
 26 11604BP. (A) Schematic representation of *tcs2* in-frame deletion by homologous  
 27 recombination. (B) Southern blot analysis. Genomic DNA restricted with BamHI from wild-  
 28 type (lane 2), single-crossover mutant (lane 5),  $\Delta tcs2$  mutant (lane 1), and wild-type revertant  
 29 (lane 3, 4, 7, 8) strains. Molecular weight marker (lane 6). The indicated HindIII-BamHI  
 30 fragment of 1041 bp was used as a probe (solid quadrangle).

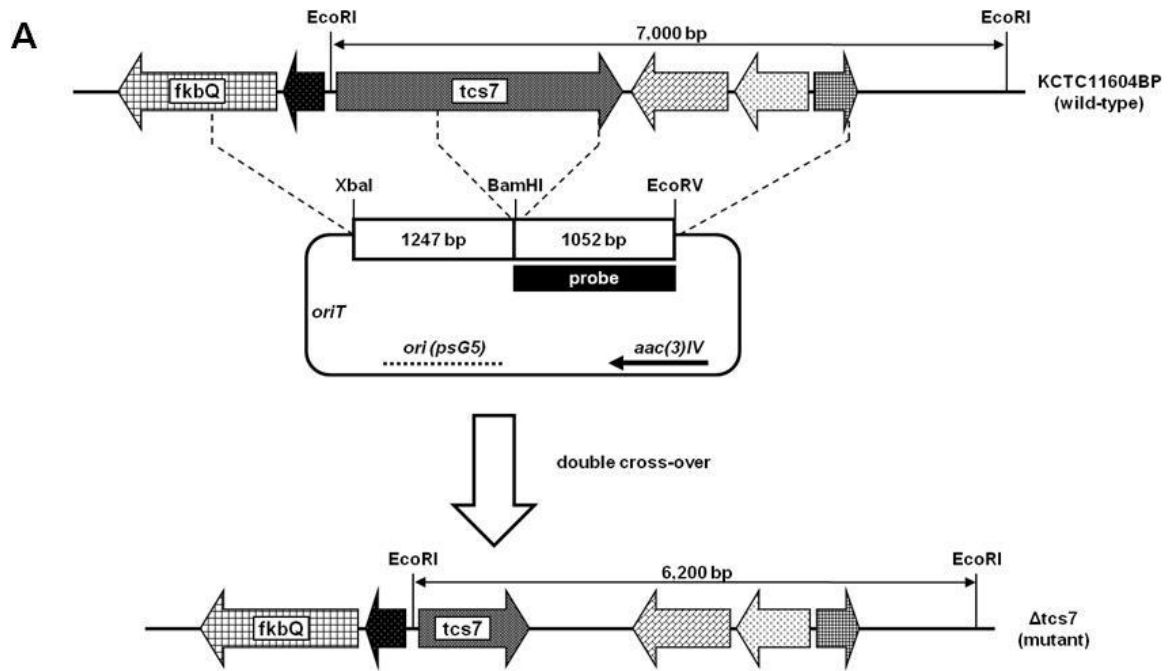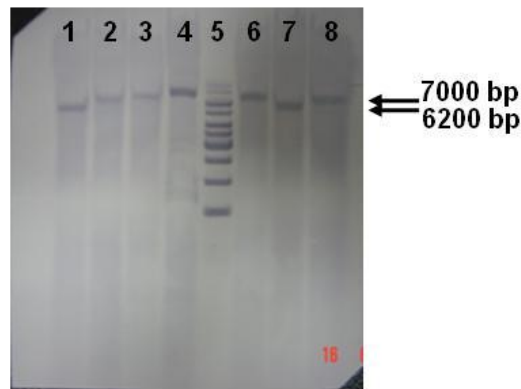

31  
32

33 Fig. S2. Construction and verification of *tcs7* in-frame deletion in *Streptomyces* sp. KCTC  
34 11604BP. (A) Schematic representation of *tcs7* in-frame deletion by homologous  
35 recombination. (B) Southern blot analysis. Genomic DNA restricted with EcoRI from wild-  
36 type (lane 2), single-crossover mutant (lane 4),  $\Delta tcs7$  mutant (lane 1, 7), and wild-type  
37 revertant (lane 3, 6, 8) strains. Molecular weight marker (lane 5). The indicated BamHI-  
38 EcoRV fragment of 1052 bp was used as a probe (solid quadrangle).

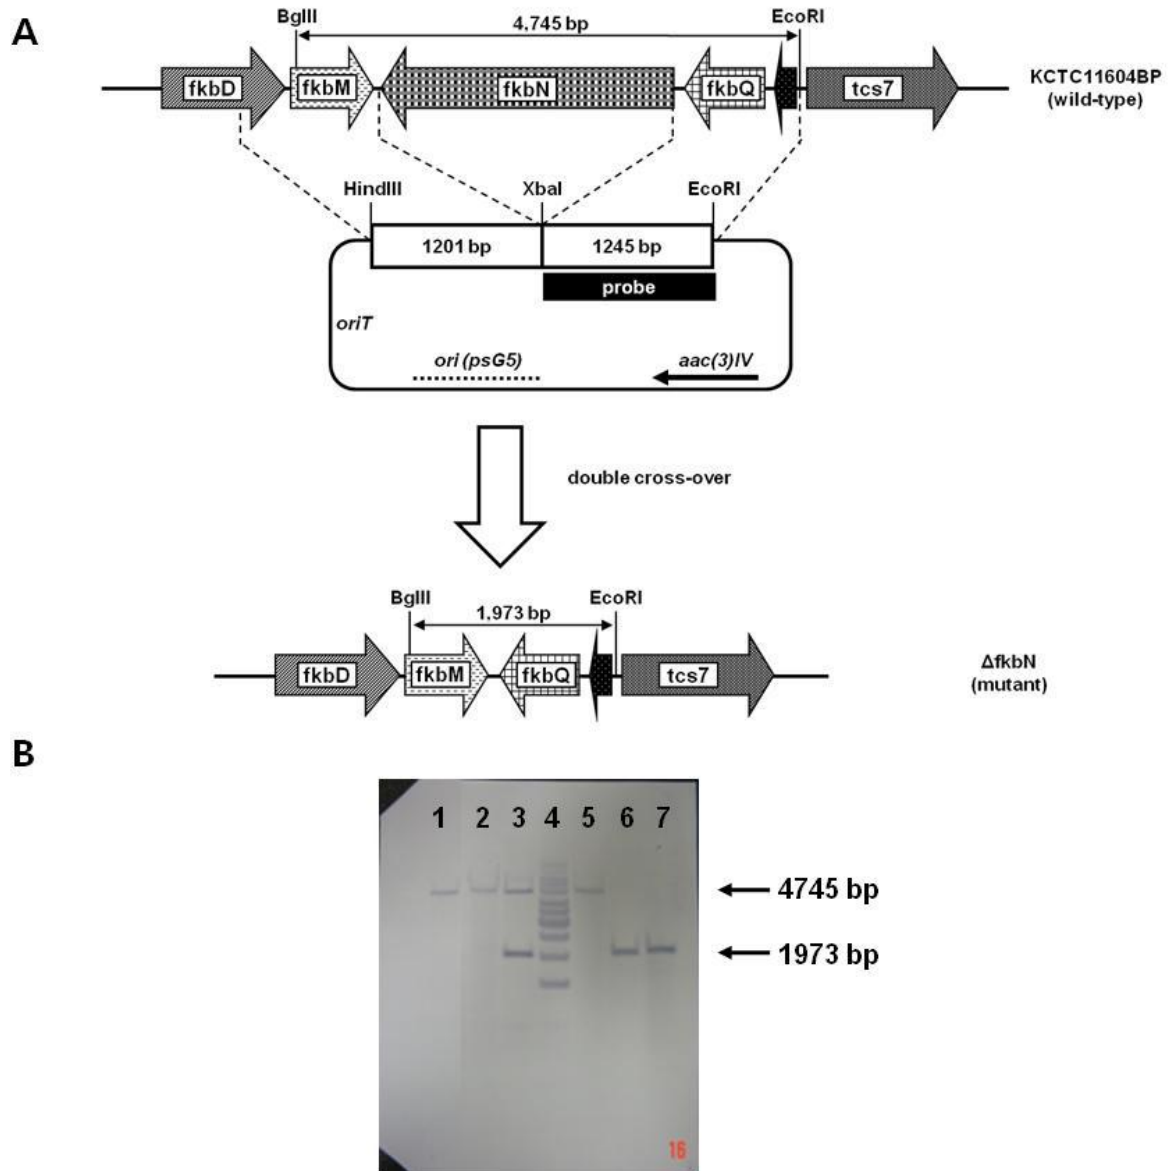

39

40

41 Fig. S3. Construction and verification of *fkbN* in-frame deletion in *Streptomyces* sp. KCTC  
 42 11604BP. (A) Schematic representation of *fkbN* in-frame deletion by homologous  
 43 recombination. (B) Southern blot analysis. Genomic DNA restricted with BglII and EcoRI  
 44 from wild-type (lane 1), single-crossover mutant (lane 3),  $\Delta fkbN$  mutant (lane 6, 7), and wild-  
 45 type revertant (lane 2, 5) strains. Molecular weight marker (lane 4). The indicated XbaI-  
 46 EcoRI fragment of 1245 bp was used as a probe (solid quadrangle).
